# Supplementary material for: Overexpressing of OsAMT1-3, a High Affinity Ammonium Transporter Gene, Modifies Rice Growth and Carbon-Nitrogen Metabolic Status
Source: PubMed Central journal article supplement (PMC4463577; doi:10.3390/ijms16059037), 2015-04-23
Supplement: ijms-16-09037-s001.pdf [file ijms-16-09037-s001.pdf]

# Supplementary Information

1 2 18 19 21 23 24 25 26 27 29 30 34 39 41

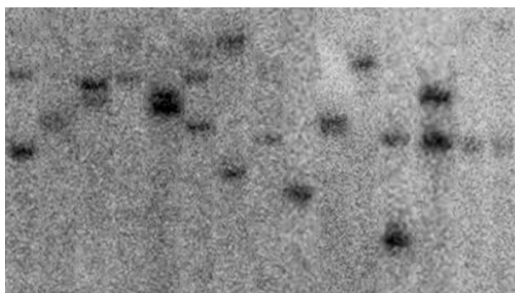

**Figure S1.** Southern blot analysis of *AMT1-3*-overexpressing plants.

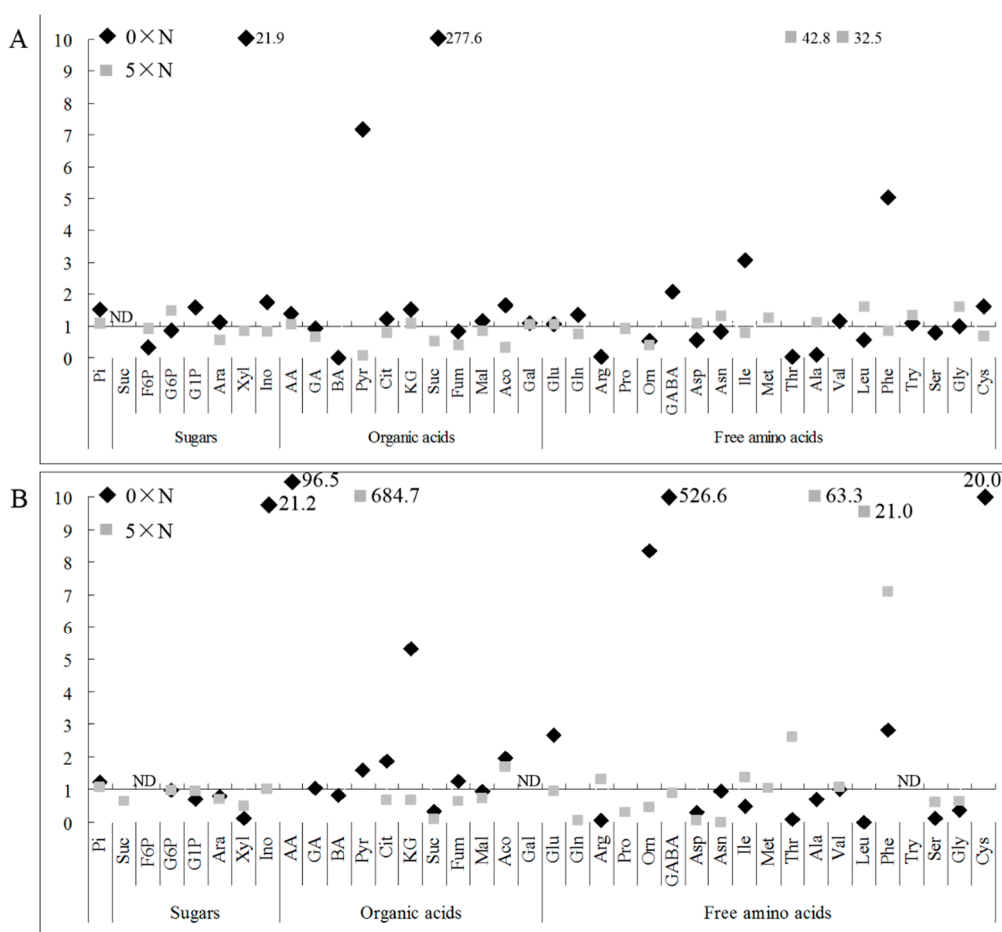

**Figure S2.** Fold change corresponds to the ratio of the concentration of individual metabolites involved in carbon and nitrogen metabolism in the *AMT1-3*-overexpressing plants relative to the wild type plants for the leaves (**A**) and roots (**B**) at the tillering stage. Pi, phosphate; Suc (in the group of sugars), sucrose; Fru, Fructose; F6P, Fructose-6-P; G6P, Glucose-6-P; G1P, Glucose-1-P; Ara, Arabinose; Xyl, Xylitol; Ino, Inositol; AA, Ascorbic acid; GA, Glutaric acid; BA, Benzoic acid; Pyr, Pyruvate; Cit, Citrate; KG, Ketoglutarate; Suc (in the group of organic acids), Succinate; Fum, Fumarate; Mal, Malate; Aco, Aconitase; Gal, galactose; Glu, Glutamate; Gln, Glutamine; Arg, Arginine; Pro, Proline; Orn, Ornithine; GABA, Aminobutyric; Asp, Aspartate; Asn, Asparagine; Ile, Isoleucine; Met, Methionine; Thr, Threonine; Ala, Alanine; Val, Valine; Leu, Leucine; Phe, Phenylalanine; Try, Tryptophan; Ser, Serine; Gly, Glycine; Cys, Cysteine.

**Table S1.** Fold change corresponding to the ratio of the gene expression level in the *AMT1-3*-overexpressing plants relative to the wild type plants for the roots and leaves at the tillering stage under 0× N, 0.1× N, 1× N, 5× N conditions.

|                    | 0× N    |         | 0.1× N  |         | 1× N    |         | 5× N    |         |
|--------------------|---------|---------|---------|---------|---------|---------|---------|---------|
|                    | Root    | Leaf    | Root    | Leaf    | Root    | Leaf    | Root    | Leaf    |
| <i>NRT1;1</i>      | 0.44 ** | 0.46 ** | 1.66    | 2.36 ** | 3.53 ** | 1.00    | 3.10 ** | 3.87 ** |
| <i>NRT1;2</i>      | 0.88    | 1.09    | 2.52 ** | 2.12 *  | 1.39    | 0.64 ** | 1.32 ** | 1.59    |
| <i>NRT2</i>        | 2.35 ** | 1.71 *  | 0.59 ** | 1.46 *  | 0.71 *  | 3.65 ** | 0.53 ** | 1.67    |
| <i>NR1</i>         | 1.96 ** | 0.36 ** | 0.01 ** | 0.21 ** | 0.96    | 0.14 ** | 2.01 ** | 2.21 ** |
| <i>NR2</i>         | 0.79    | 0.23 ** | 0.21 *  | 2.28 ** | 1.41 *  | 0.66 *  | 1.79 ** | 1.17 *  |
| <i>GS1;1</i>       | 0.48 ** | 0.74 *  | 1.16    | 1.03    | 0.97    | 0.79    | 2.50 ** | 1.43 *  |
| <i>GS1;2</i>       | 1.12    | 0.82    | 2.36 ** | 1.52 ** | 0.69 *  | 1.08    | 0.90    | 2.49 ** |
| <i>GS1;3</i>       | 0.76    | 0.84 *  | 3.89 ** | 7.47 ** | 2.50 ** | 1.22    | 1.94 ** | 1.78 ** |
| <i>GS2</i>         | 0.56 ** | 0.55 ** | 2.46 ** | 1.63 ** | 1.77 *  | 1.20    | 0.73 *  | 2.39 ** |
| <i>Fd-GOGAT1</i>   | 0.49 ** | 1.03    | 0.49 ** | 1.40 ** | 1.56 ** | 1.02    | 1.62 ** | 1.62 ** |
| <i>Fd-GOGAT2</i>   | 1.12    | 0.53 ** | 1.74 ** | 1.06    | 1.53 *  | 1.26 ** | 1.30 *  | 1.52 ** |
| <i>NADH-GOGAT1</i> | 1.24 ** | 0.77 ** | 0.48 ** | 1.73 ** | 1.46 ** | 0.88    | 1.07    | 2.29 ** |
| <i>NADH-GOGAT2</i> | 0.74    | 1.85 ** | 0.24 ** | 2.96 ** | 0.65 ** | 2.36 ** | 0.19 ** | 1.86 ** |
| <i>RUBISCO</i>     | 1.05    | 0.37 ** | 0.25 ** | 1.53 ** | 2.48 ** | 1.73 ** | 1.78 ** | 2.20 ** |
| <i>PEPC1</i>       | 0.63 ** | 0.55 ** | 1.11    | 2.13 ** | 0.23 ** | 0.75    | 3.62 ** | 2.17 ** |
| <i>PEPC2</i>       | 0.15 ** | 0.57 ** | 1.22    | 2.34 ** | 1.37 *  | 1.44 *  | 0.43 ** | 1.85 ** |
| <i>PEPC3</i>       | 0.25 ** | 0.83 *  | 0.62 ** | 0.98    | 0.57 *  | 1.36 *  | 3.03 ** | 3.77 ** |
| <i>PEPC4</i>       | 0.40 ** | 0.98    | 0.48 ** | 1.48 ** | 1.37    | 1.48 ** | 2.90 ** | 3.05 ** |
| <i>PEPC6</i>       | 0.98    | 1.02    | 1.46 ** | 0.97    | 2.18 ** | 0.88    | 3.91 ** | 2.54 ** |
| <i>PEPC7</i>       | 0.84    | 0.75 *  | 1.61 ** | 1.32 ** | 0.49 *  | 1.43 ** | 2.14 ** | 1.82 ** |

\*, \*\* indicate the significant differences between the *AMT1-3*-overexpressing plants and wild type plants at the level of  $p = 0.05$  and  $p = 0.01$ , respectively, from three biological replications. NRT: nitrate transporter; NR: nitrate reductase; GS: glutamine synthetase; GOGAT: glutamate synthase; RUBISCO: Ribulose-1,5-bisphosphate carboxylase/oxygenase; PEPC: phosphoenolpyruvate carboxylase.

**Table S2.** Primer sequences of the key genes involved in the carbon and nitrogen metabolism used in qRT-PCR.

| Gene Name          | cDNA Accession NO. | Primer Sequence                                        |
|--------------------|--------------------|--------------------------------------------------------|
| <i>NRT1;1</i>      | AK066920           | F: CCTCGCAAGTGACCCTTGAAT<br>R: CGATGGCTAATGAGGAACCCTT  |
| <i>NRT1;2</i>      | AK101480           | F: GAACATGCGGATCATGTCGTT<br>R: CGATCACGGAGCTGTACATGAG  |
| <i>NRT2</i>        | AK109733           | F: TTCGCGAACCCGCATATGA<br>R: GTTGAGGTTGTCGCGGATGAT     |
| <i>NRI</i>         | AK102178           | F: ACTACCATTACCGCGACAACC<br>R: CTCGTTTATCATGTACTCCGGC  |
| <i>NR2</i>         | AK121810           | F: AGCTGAACGTGAACTCGGTGA<br>R: AGGCGTATCCCTTCATGGTGT   |
| <i>GS1;1</i>       | AK109397           | F: GAGTCGTCGTCTCATTTGACCC<br>R: GTAGCCACCATCGTTCCTCATC |
| <i>GS1;2</i>       | AK243037           | F: TTTTCAAGGACCCGTTTCAGGA<br>R: CGGCACTGTGCCTCTTGTTAGT |
| <i>GS1;3</i>       | AK099290           | F: TCAAGCCATCTTCAGAGACCCA<br>R: TACCGTTGTTCGTCGGAATC   |
| <i>GS2</i>         | AK063706           | F: AGGATCGGACAAATCGTTTGG<br>R: GCATGACCTCTCCATTTGTTCC  |
| <i>Fd-GOGAT1</i>   | AK102025           | F: AAATGCCTCTTTGCAAGGCC<br>R: GACTGTGAG CCCCATCCAATA   |
| <i>Fd-GOGAT2</i>   | AK068130           | F: CCGATGCGATTGAGAATGAGA<br>R: CTTCTTGGCAATGACACCTGC   |
| <i>NADH-GOGAT1</i> | AK105755           | F: TGCTTGAGAGAATGGCGCA<br>R: AACCCAGCATCCTTTGTCACC     |
| <i>NADH-GOGAT2</i> | AK070485           | F: GGTGTGTCATTGGTGGTGGAGA<br>R: TGGTGGCTCTGGCAAAAGTT   |
| <i>RUBISCO</i>     | AK243615           | F: AGGCTTCAAATTGCCGTTGA<br>R: TCTAGGCCATCCAGTTCCTCCT   |
| <i>PEPC1</i>       | AK100688           | F: ACATTCCGTGTTGCTGCAGAG<br>R: TGCAACAGTTCAACCGCTAGG   |
| <i>PEPC2</i>       | AK066635           | F: CAGAAGCACGCAAGCATTAGG<br>R: CGCGAGAATCTCTCTCTGAAGG  |
| <i>PEPC3</i>       | AK101274           | F: ACCGGTCCATTGTCTTCCAAG<br>R: CGTTTTGATGGCCTACTTCCAA  |
| <i>PEPC4</i>       | AK065425           | F: TGGATGAGATGGCTGTTGTGG<br>R: TTCTGTCTCAGGTGTTGCCGA   |
| <i>PEPC6</i>       | AK073703           | F: ATGTCTGCCAGGCTTACACGAT<br>R: CGGCTTAGACCAGTCCATGATC |
| <i>PEPC7</i>       | AK242583           | F: GAGTATTTCCGCCTTGCAACAC<br>R: ACGGAGTGATTCAATGCCTCC  |
| <i>ACTIN</i>       | AK070531           | F: GACAATGGAACCGGAATGGTC<br>R: CCCAACCATAACGCCTGTATGT  |
